# Supplementary material for: Parents’ and Guardians’ Willingness to Vaccinate Their Children against COVID-19: A Systematic Review and Meta-Analysis
Source: MDPI journal article supplement (doi:10.3390/vaccines10020179), 2022-01-24
Supplement: s1 [file s1]

**Table S1.** Search string used in PubMed.

---

((("Infant"[Mesh]) OR (((("Child"[Mesh]) OR (children[Title/Abstract])) OR (("Adolescent"[Mesh]) OR (((((((adolescents[Title/Abstract]) OR (adolescence[Title/Abstract])) OR (teen[Title/Abstract])) OR (teens[Title/Abstract])) OR (teenager[Title/Abstract])) OR (teenagers[Title/Abstract])) OR (youth[Title/Abstract])) OR (youths[Title/Abstract]))))) AND (((("COVID-19 Vaccines"[Mesh]) OR (((("SARS-CoV-2"[Mesh]) OR (((((((((((Coronavirus Disease 2019 Virus[Title/Abstract]) OR (2019 Novel Coronavirus[Title/Abstract])) OR (2019 Novel Coronaviruses[Title/Abstract])) OR (SARS-CoV-2 Virus[Title/Abstract])) OR (SARS CoV 2 Virus[Title/Abstract])) OR (SARS-CoV-2 Viruses[Title/Abstract])) OR (2019-nCoV[Title/Abstract])) OR (COVID-19 Virus[Title/Abstract])) OR (COVID 19 Virus[Title/Abstract])) OR (COVID-19 Viruses[Title/Abstract])) OR (SARS Coronavirus 2[Title/Abstract])) OR (Severe Acute Respiratory Syndrome Coronavirus 2[Title/Abstract])) OR (((("COVID-19"[Mesh]) OR (((((((((((((((COVID 19[Title/Abstract]) OR (COVID-19 Virus Disease[Title/Abstract])) OR (COVID 19 Virus Disease[Title/Abstract])) OR (COVID-19 Virus Diseases[Title/Abstract])) OR (COVID-19 Virus Infection[Title/Abstract])) OR (COVID 19 Virus Infection[Title/Abstract])) OR (COVID-19 Virus Infections[Title/Abstract])) OR (2019-nCoV Infection[Title/Abstract])) OR (2019 nCoV Infection[Title/Abstract])) OR (2019-nCoV Infections[Title/Abstract])) OR (Coronavirus Disease-19[Title/Abstract])) OR (Coronavirus Disease 19[Title/Abstract])) OR (2019 Novel Coronavirus Disease[Title/Abstract])) OR (2019 Novel Coronavirus Infection[Title/Abstract])) OR (2019-nCoV Disease[Title/Abstract])) OR (2019 nCoV Disease[Title/Abstract])) OR (2019-nCoV Diseases[Title/Abstract])) OR (Coronavirus Disease 2019[Title/Abstract])) OR (SARS Coronavirus 2 Infection[Title/Abstract])) OR (SARS-CoV-2 Infection[Title/Abstract])) OR (SARS CoV 2 Infection[Title/Abstract])) OR (SARS-CoV-2 Infections[Title/Abstract])))) AND (((("Vaccines"[Mesh]) OR (((((((((((Vaccine[Title/Abstract]) OR (vaccin[Title/Abstract])) OR (vaccins[Title/Abstract])) OR (vaccinated[Title/Abstract])) OR (vaccinal[Title/Abstract])) OR (vaccinate[Title/Abstract])) OR (vaccinated[Title/Abstract])) OR (vaccinates[Title/Abstract])) OR (vaccinator[Title/Abstract])) OR (vaccinators[Title/Abstract])) OR (vaccinating[Title/Abstract])) OR ("Vaccination"[Mesh]) OR (((Vaccinations[Title/Abstract]) OR (Active Immunization[Title/Abstract])) OR (Active Immunizations[Title/Abstract]))))) AND (((("Surveys and Questionnaires"[Mesh]) OR ("Health Surveys"[Mesh]) OR (((((((survey) OR (surveys)) OR (surveyed)) OR (surveying)) OR (questionnaire)) OR (questionnaires)) OR (questionnaire))))

---
