# Supplementary figures and images for: Parents’ and Guardians’ Willingness to Vaccinate Their Children against COVID-19: A Systematic Review and Meta-Analysis
Source: MDPI journal article supplement (doi:10.3390/vaccines10020179), 2022-01-24

**Figure S1. Funnel plot and Egger's test.**

① **Funnel plot:**

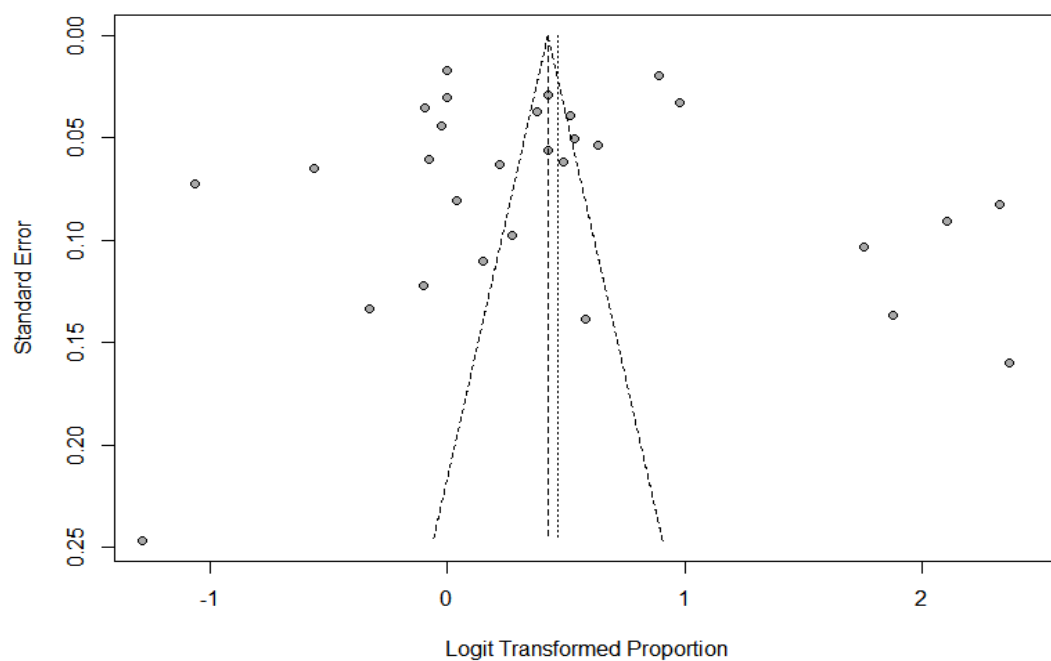

② **Egger's test:  $P = 0.6188 > 0.05$**

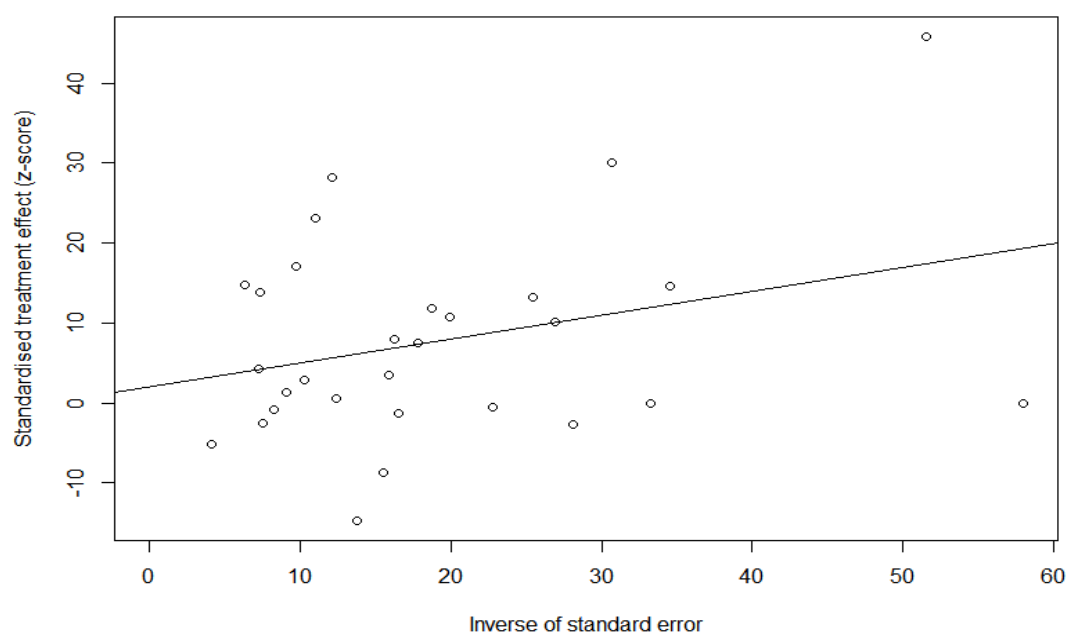

Supplement: s1 [file s1]
